# Supplementary material
Source: Springer Nature journal article supplement (https://www.springermedizin.de/resource/supplementary/13012_2011_446_MOESM1_ESM.pdf/9629766)

### Glycaemic control message

### Cholesterol control message

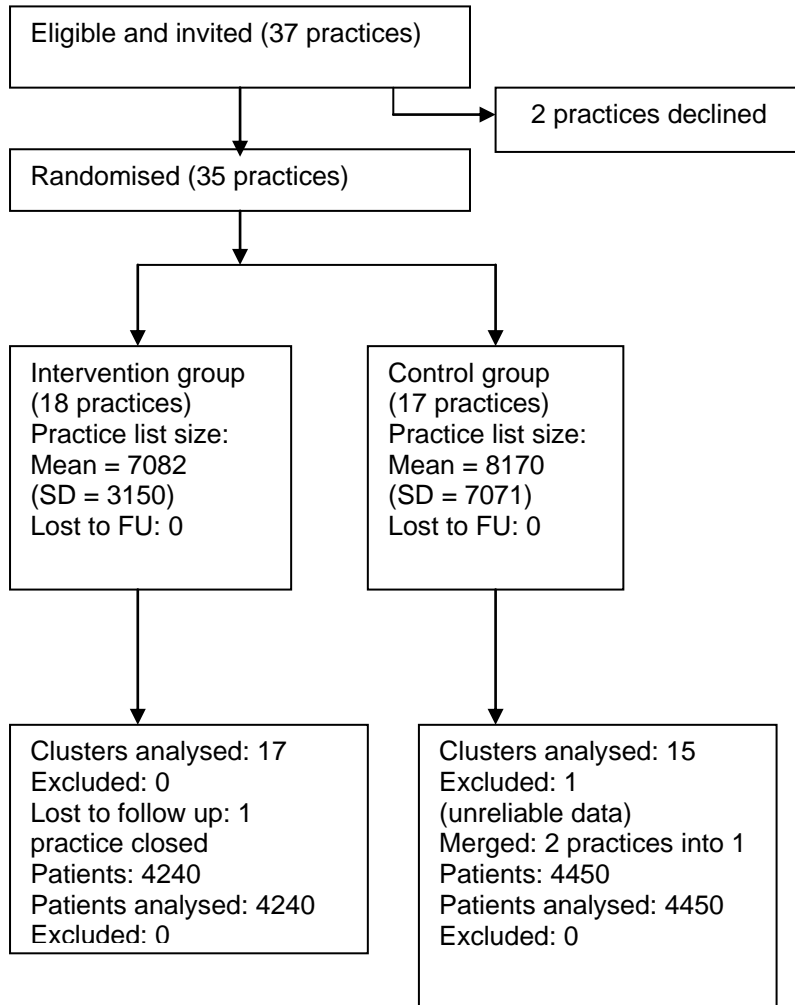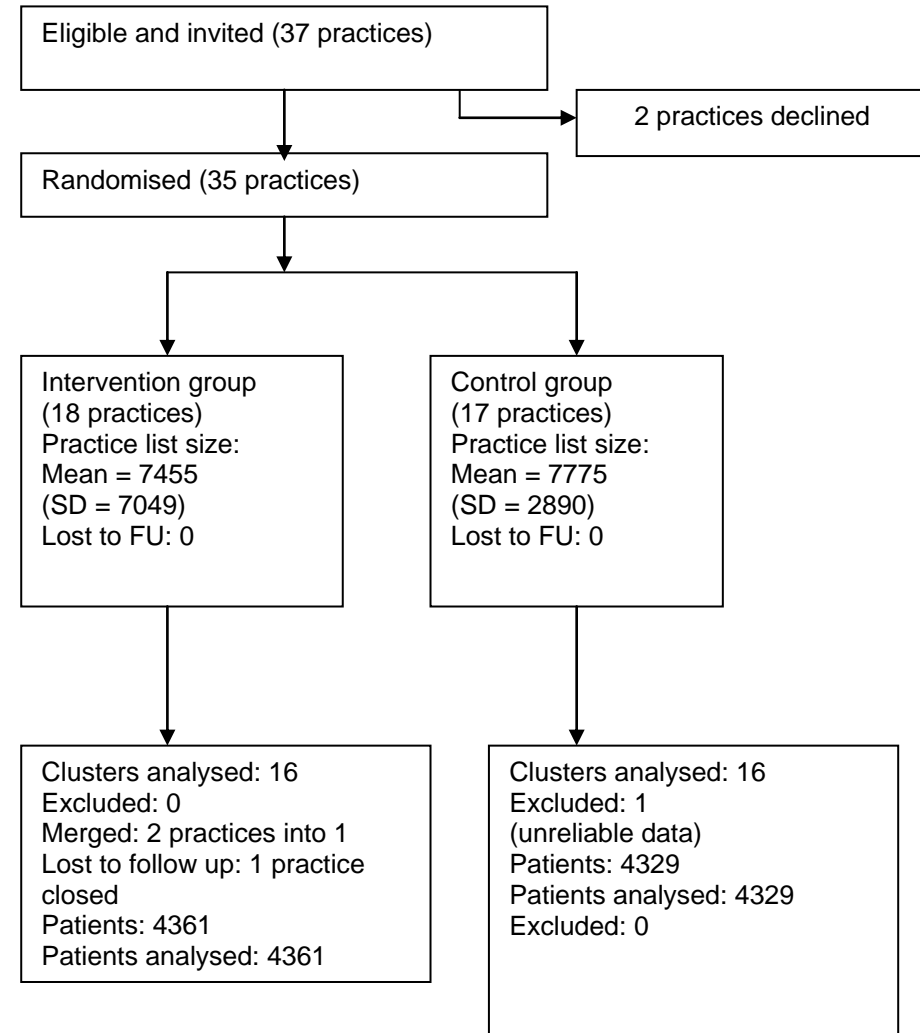

Supplement: MOESM1 [file 9629766]
